# Supplementary material for: Electrogelation of PEDOT:PSS and its copolymer for bioelectronics
Source: Royal Society of Chemistry journal article supplement (doi:10.1039/d4tc02908a), 2024-01-01
Supplement: d4tc02908a1.pdf [file d4tc02908a1.pdf]

## SUPPORTING INFORMATION

---

### Electrogelation of PEDOT:PSS and its Copolymers for Bioelectronics

Christopher Slaughter,<sup>a†</sup> Santiago Velasco-Bosom,<sup>a†</sup> Xudong Tao,<sup>a</sup> Ruben Ruiz-Mateos Serrano,<sup>a</sup> Stefany Kisoovsky,<sup>a</sup> Ryo Mizuta,<sup>a</sup> Daniele Mantione,<sup>b,c</sup> Scott T. Keene<sup>a,d</sup> George G. Malliaras<sup>a\*</sup> and Antonio Dominguez-Alfaro<sup>a\*</sup>

<sup>a</sup> Electrical Engineering Division, Department of Engineering, University of Cambridge, 9 JJ Thomson Ave, Cambridge, CB3 0FA, UK

<sup>b</sup> POLYMAT, University of the Basque Country UPV/EHU, Avenida Tolosa 72, Donostia-San Sebastián, Gipuzkoa 20018, Spain

<sup>c</sup> IKERBASQUE, Basque Foundation for Science, 48009, Bilbao, Spain

<sup>d</sup> Cavendish Laboratory, University of Cambridge, JJ Thomson Ave, Cambridge, CB3 0H, UK

<sup>†</sup> Authors contributed equally to this work

Corresponding authors:

Antonio Dominguez-Alfaro (E-mail: [ad2151@cam.ac.uk](mailto:ad2151@cam.ac.uk))

George Malliaras (E-mail: [gm603@cam.ac.uk](mailto:gm603@cam.ac.uk))

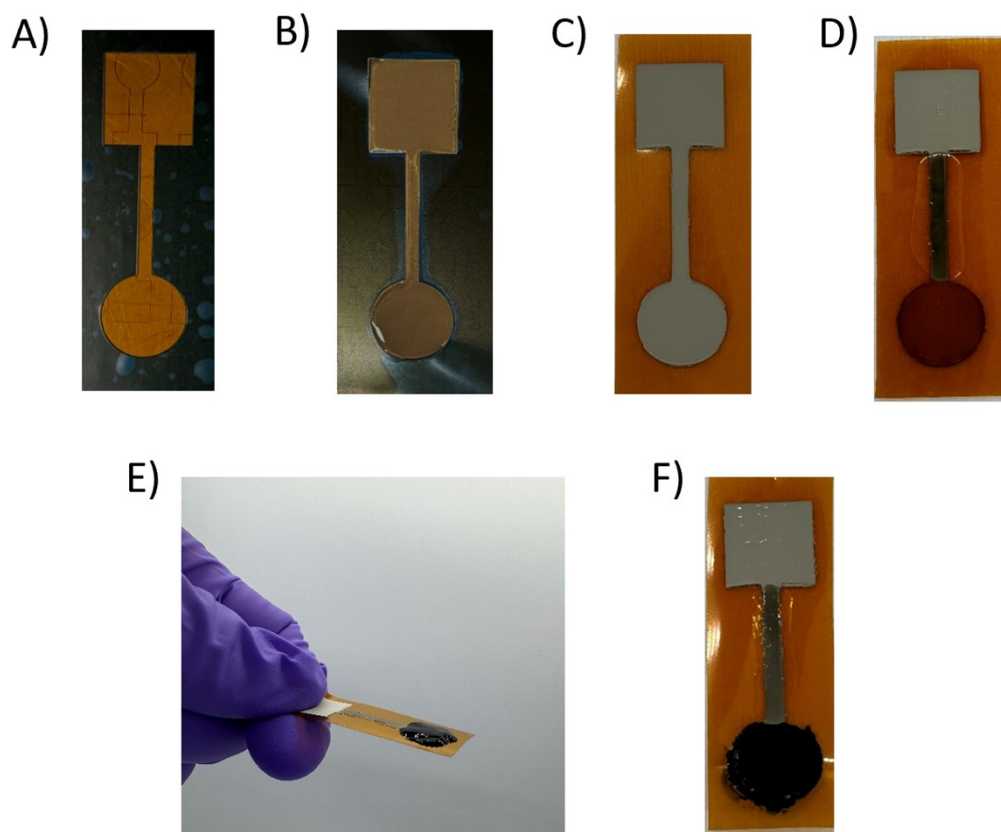

**Figure S1.** Circular electrode with a diameter of 10mm displayed at each stage of the electrode fabrication process. A) Blue silicon tape mask adhered to the Kapton substrate B) Silver nanoparticle paste deposited over the mask C) Cured silver nanoparticle electrode on kapton substrate D) silver electrode electrochemically copperplated in 40mM  $\text{CuSO}_4$  in 5% acetic acid solution E) After 500 sec of electrogelation, the PEDOT:PSS gel is formed on the surface of the electrode F) PEDOT:PSS electrogelated electrode after annealing at 100° for 5 minutes.

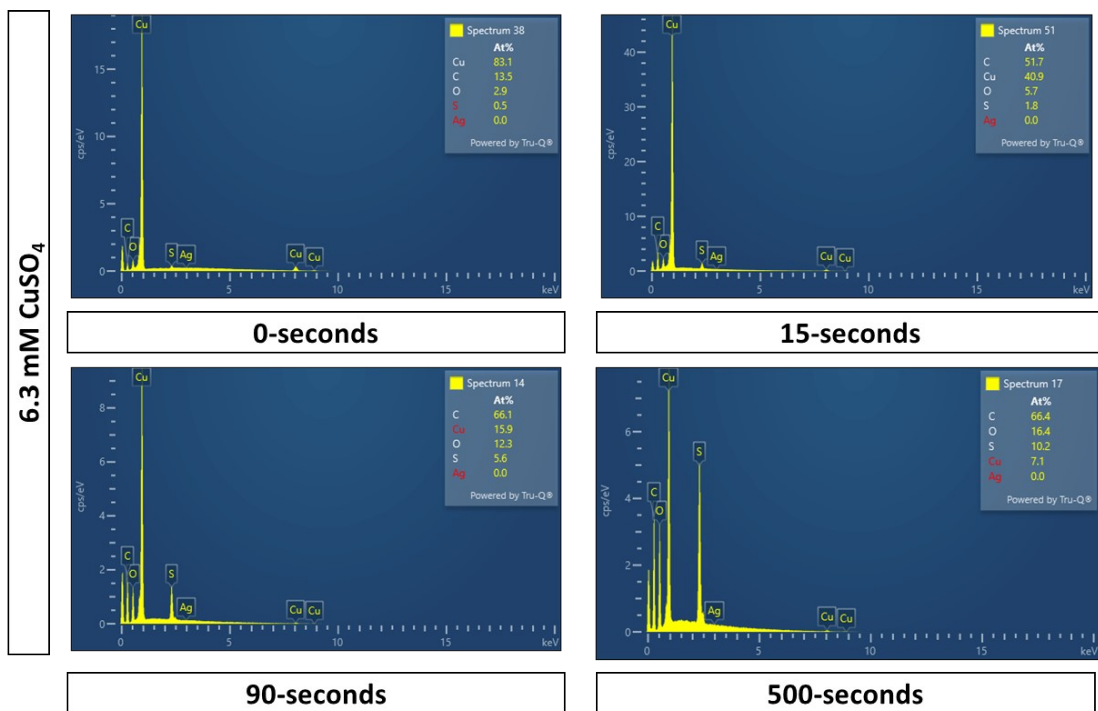

**Figure S2.** EDX spectra of 1 cm diameter electrodes copper electroplated at 6.3 mM of CuSO<sub>4</sub> and 0, 15, 90 and 500-sec of PEDOT:PSS electrogelation

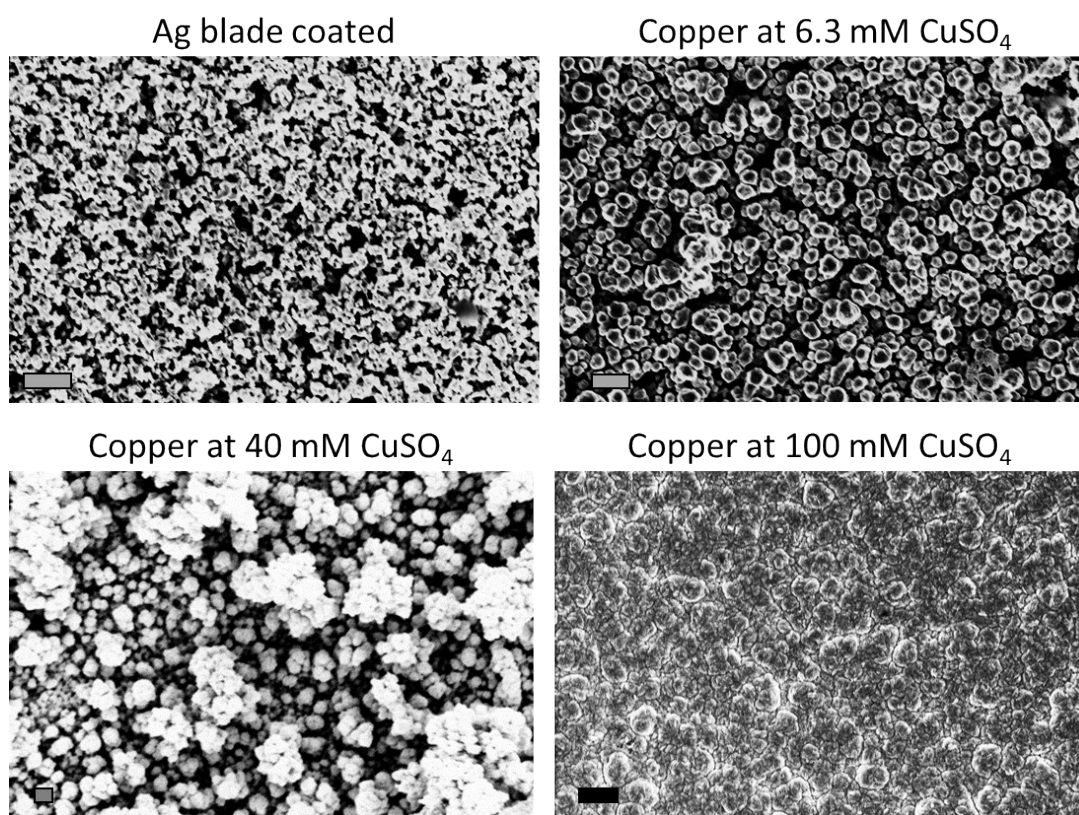

**Figure S3.** SEM images of 1 cm diameter electrodes for blade-coated silver and copper electroplated at 6.3, 40 and 500 mM of CuSO<sub>4</sub> (bar scale: 1μm )

| 6.3 mM of CuSO <sub>4</sub> |             |            |            |            |
|-----------------------------|-------------|------------|------------|------------|
|                             | 0-sec       | 15-sec     | 90-sec     | 500-sec    |
| <b>Copper (Cu)</b>          | 81.2 ± 16.0 | 57.0 ± 6.2 | 14.6 ± 2.3 | 7.3 ± 1.0  |
| <b>Sulphur (S)</b>          | 0.8 ± 0.8   | 1.7 ± 0.6  | 7.9 ± 2.3  | 11.7 ± 1.5 |
| <b>Silver (Ag)</b>          | 0.37 ± 0.4  | 0.2 ± 0.4  | 0.0 ± 0.0  | 0.0 ± 0.0  |

  

| 40 mM of CuSO <sub>4</sub> |            |             |             |            |
|----------------------------|------------|-------------|-------------|------------|
|                            | 0-sec      | 15-sec      | 90-sec      | 500-sec    |
| <b>Copper (Cu)</b>         | 97.3 ± 2.9 | 32.8 ± 12.1 | 82.8 ± 14.3 | 5.7 ± 0.71 |
| <b>Sulphur (S)</b>         | 0.0 ± 0.0  | 3.9 ± 1.0   | 0.7 ± 1.0   | 9.5 ± 0.7  |
| <b>Silver (Ag)</b>         | 0.0 ± 0.0  | 0.1 ± 0.2   | 2.05 ± 2.9  | 0.0 ± 0.0  |

  

| 100 mM of CuSO <sub>4</sub> |            |             |           |            |
|-----------------------------|------------|-------------|-----------|------------|
|                             | 0-sec      | 15-sec      | 90-sec    | 500-sec    |
| <b>Copper (Cu)</b>          | 85.9 ± 4.0 | 65.5 ± 7.13 | 6.5 ± 1.3 | 12.2 ± 6.9 |
| <b>Sulphur (S)</b>          | 0.2 ± 0.3  | 1.0 ± 0.1   | 7.7 ± 0.5 | 7.3 ± 0.8  |
| <b>Silver (Ag)</b>          | 0.0 ± 0.0  | 0.0 ± 0.0   | 0.0 ± 0.1 | 0.0 ± 0.0  |

**Table S1.** Composition of electrodes electroplated at three different CuSO<sub>4</sub> concentrations and its respective electrogelation of PEDOT:PSS times

|                           |                             | 0-sec     | 15-sec    | 90-sec    | 500-sec   |
|---------------------------|-----------------------------|-----------|-----------|-----------|-----------|
| <b>Particle Size (µm)</b> | 6.3 mM of CuSO <sub>4</sub> | 0.8 ± 0.2 | 1.9 ± 0.4 | 2.2 ± 0.8 | 2.8 ± 0.8 |
|                           | 40 mM of CuSO <sub>4</sub>  | 1.5 ± 0.4 | 1.9 ± 0.9 | 1.9 ± 0.7 | 4.4 ± 1.1 |
|                           | 100 mM of CuSO <sub>4</sub> | 2.1 ± 0.7 | 1.5 ± 0.7 | 2.7 ± 1.2 | 2.6 ± 0.8 |
|                           | Silver electrode            | 0.9 ± 0.3 |           |           |           |

**Table S2.** Particle size was measured on the electrodes using different CuSO<sub>4</sub> electrolyte concentrations and three different electrogelation times

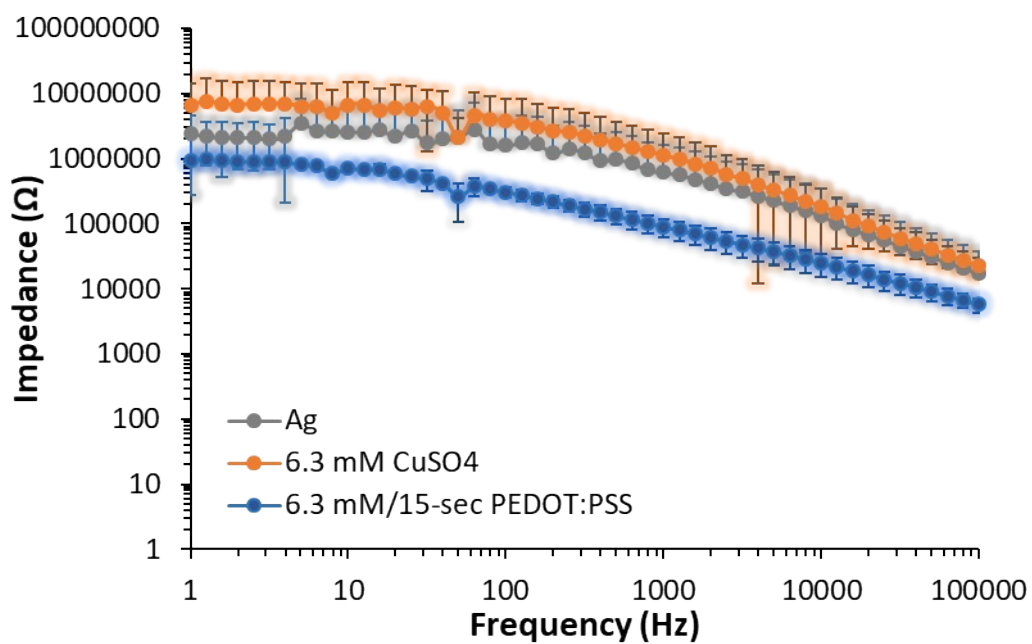

**Figure S4.** EIS of the circular electrodes (1 cm diameter) on the skin of silver, copper electroplated and 15-sec PEDOT:PSS electroplated electrodes

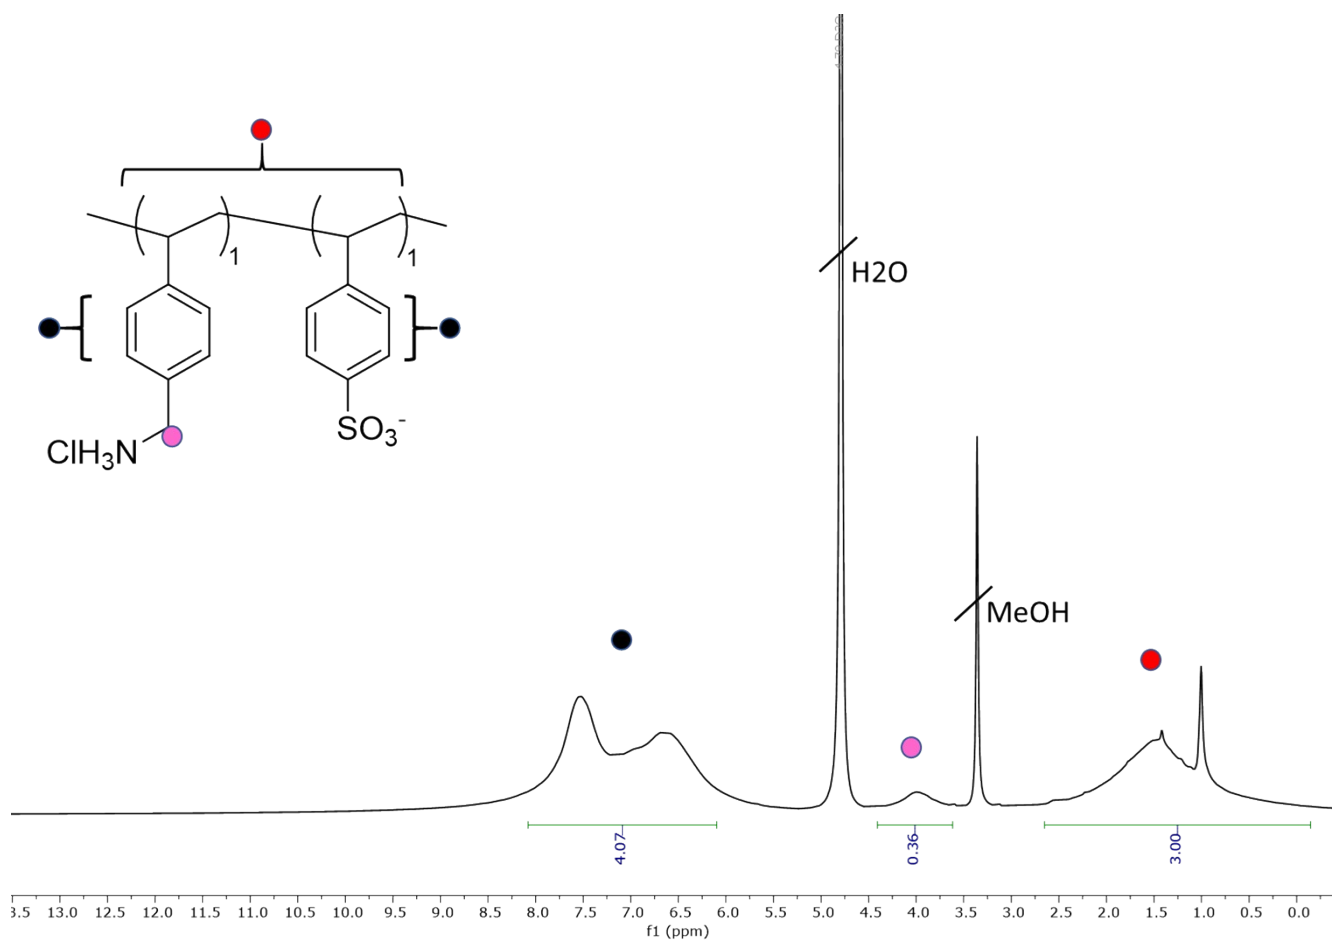

**Figure S5.**  $^1\text{H}$ NMR of the polystyrene sulfonate-co-styrene methenamine (PEDOT:PSS-co-PSMA) copolymer

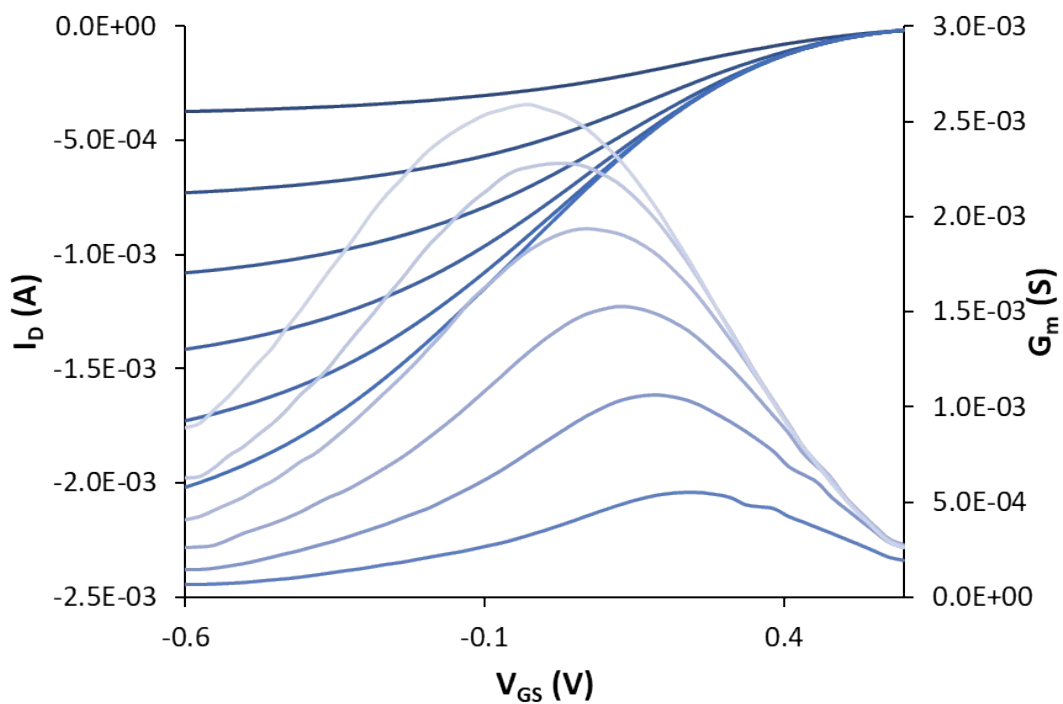

**Figure S6.** Transfer-characteristics and transconductance peaks at varying drain voltages from 0 to -0.6V of an OEET with a channel of  $L = 600\mu\text{m}$ ,  $W = 70\mu\text{m}$ , and a Ag/Cu/PEDOT:PSS gate with  $R = 2\text{mm}$
